# Supplementary figures and images for: Transcriptome Profiling, Biochemical and Physiological Analyses Provide New Insights towards Drought Tolerance in Nicotiana tabacum L
Source: MDPI journal article supplement (doi:10.3390/genes10121041), 2019-12-15

# Statistics of Pathway Enrichment

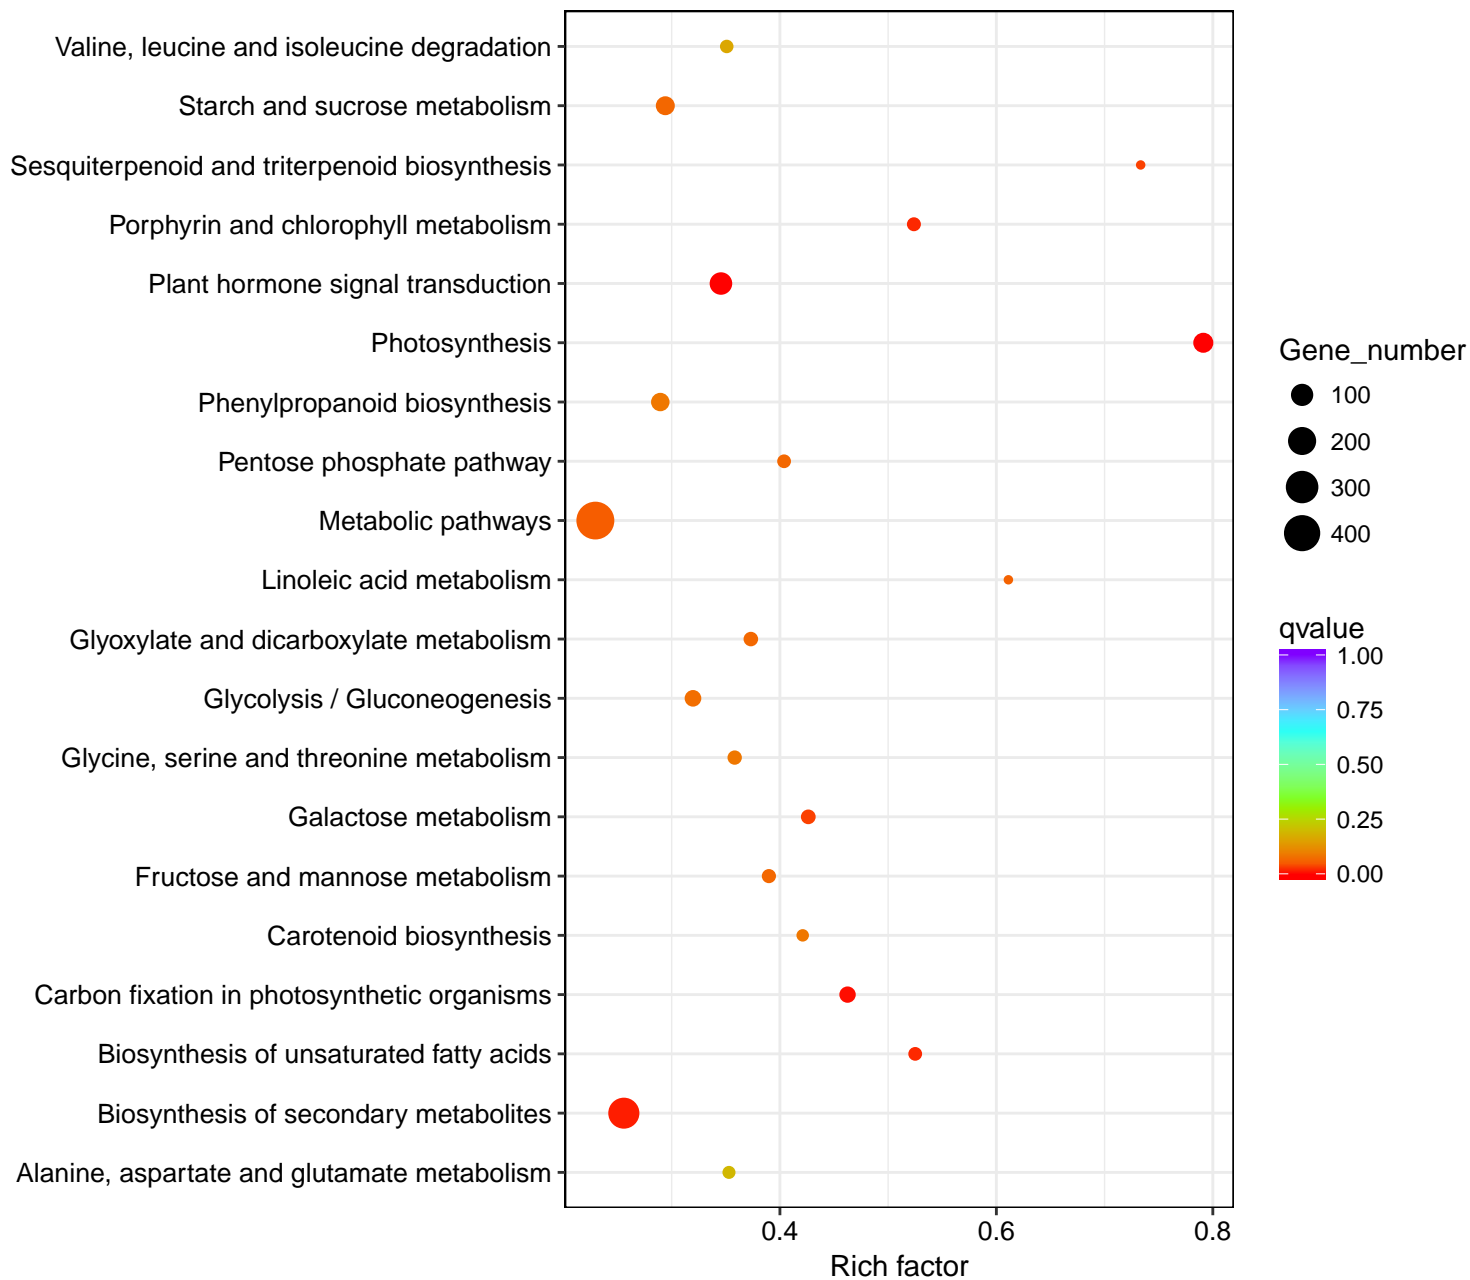

Supplement: s1 [file s1]

FPKM distribution

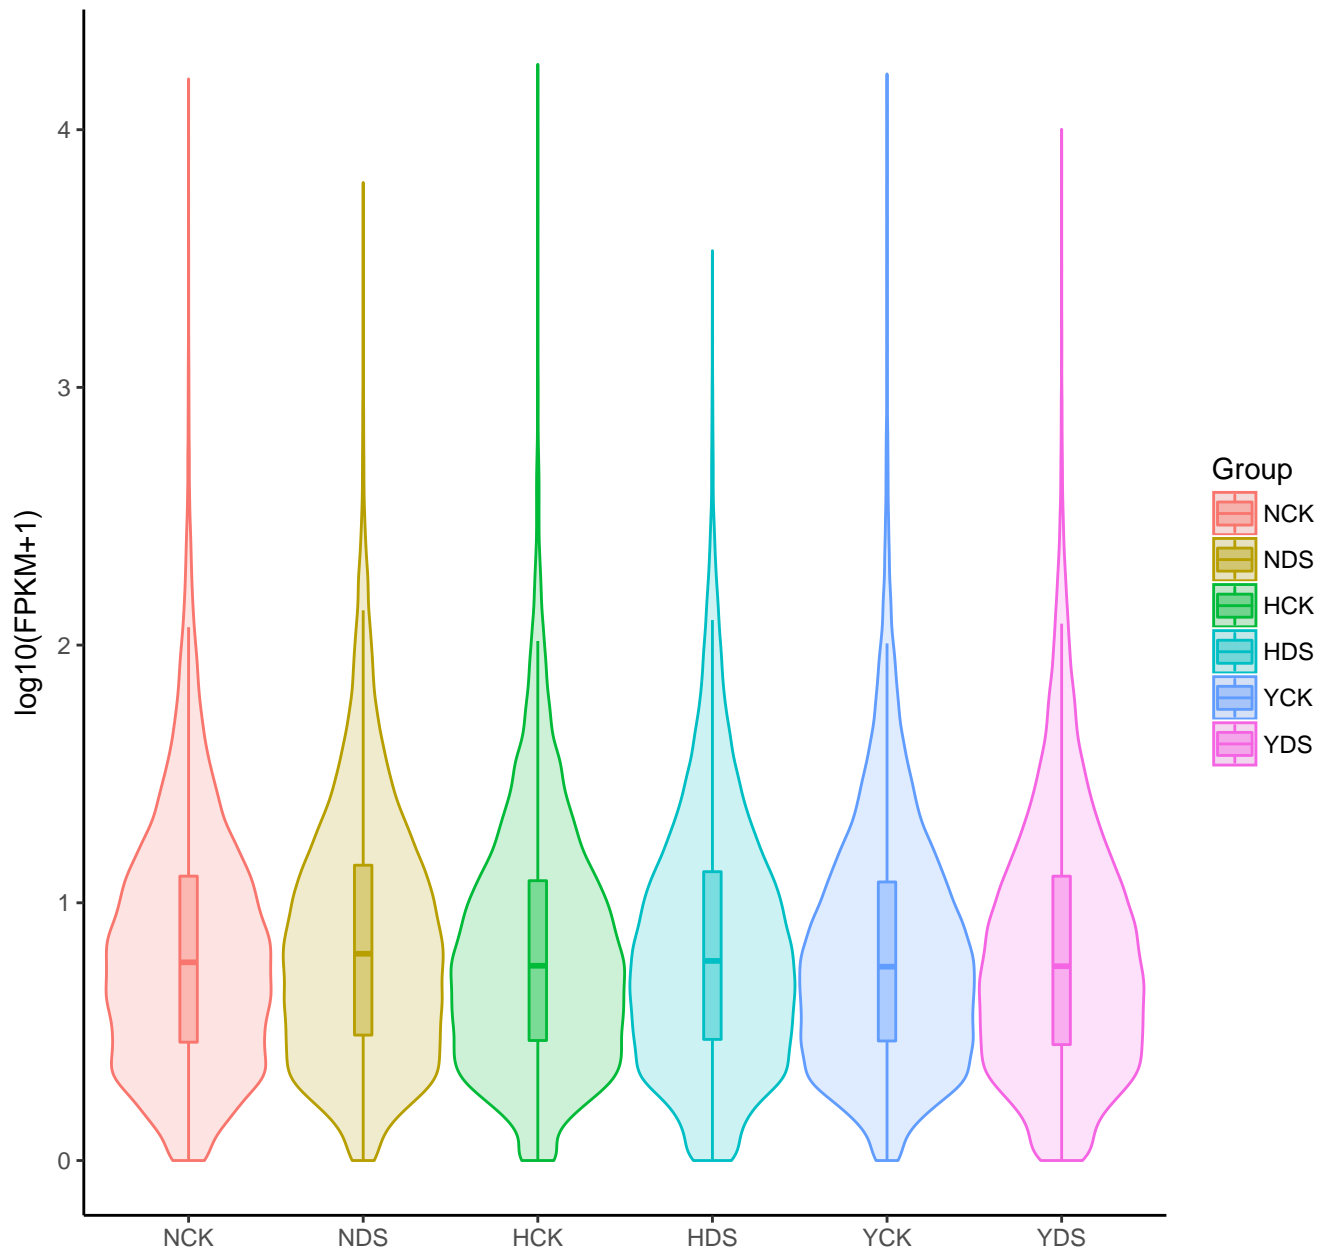

Supplement: s1 [file s1]

# The Most Enriched GO Terms

GO term

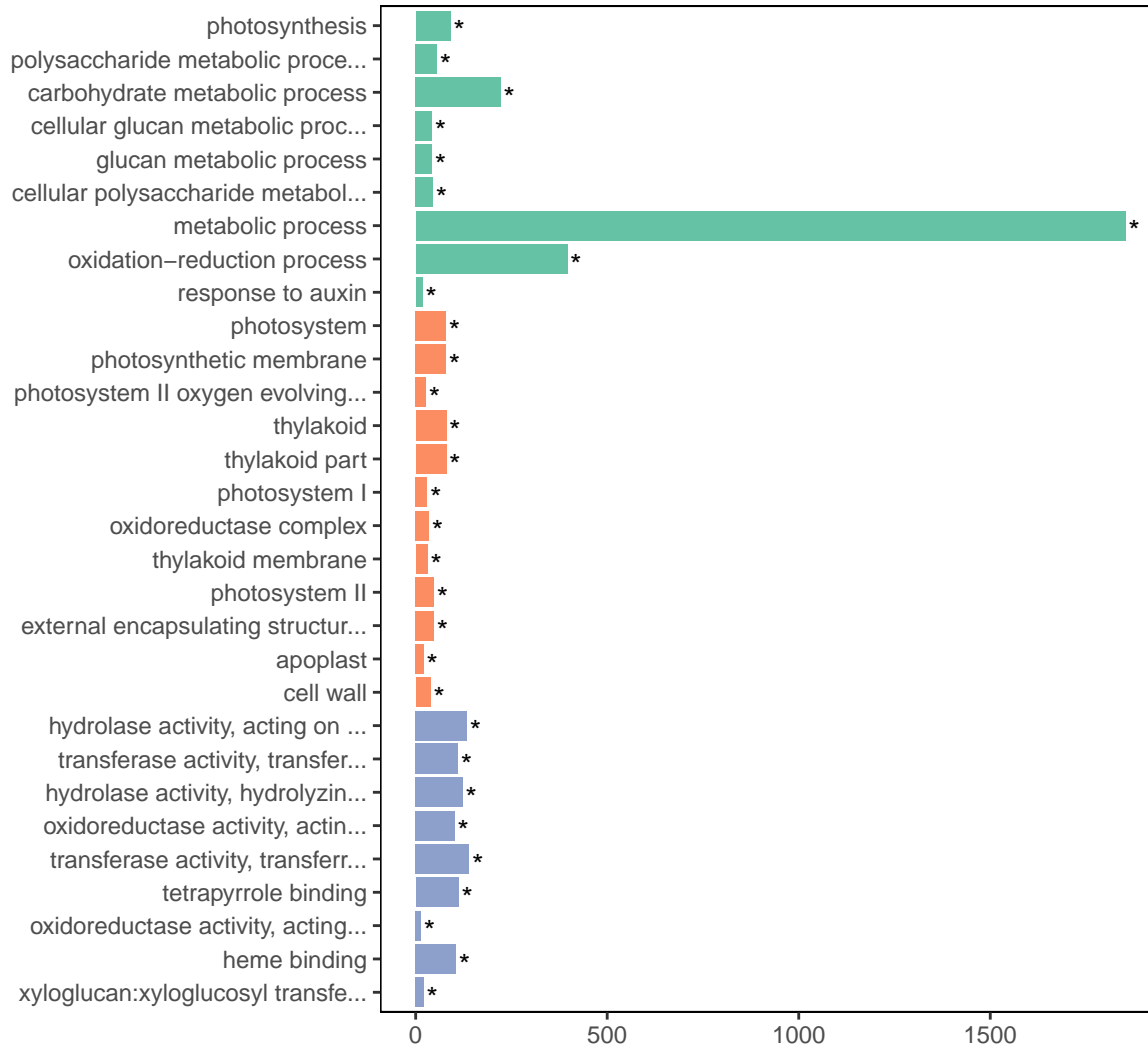

type

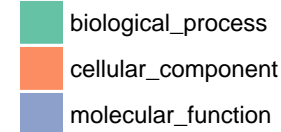

Number of genes

Supplement: s1 [file s1]

FPKM density distribution

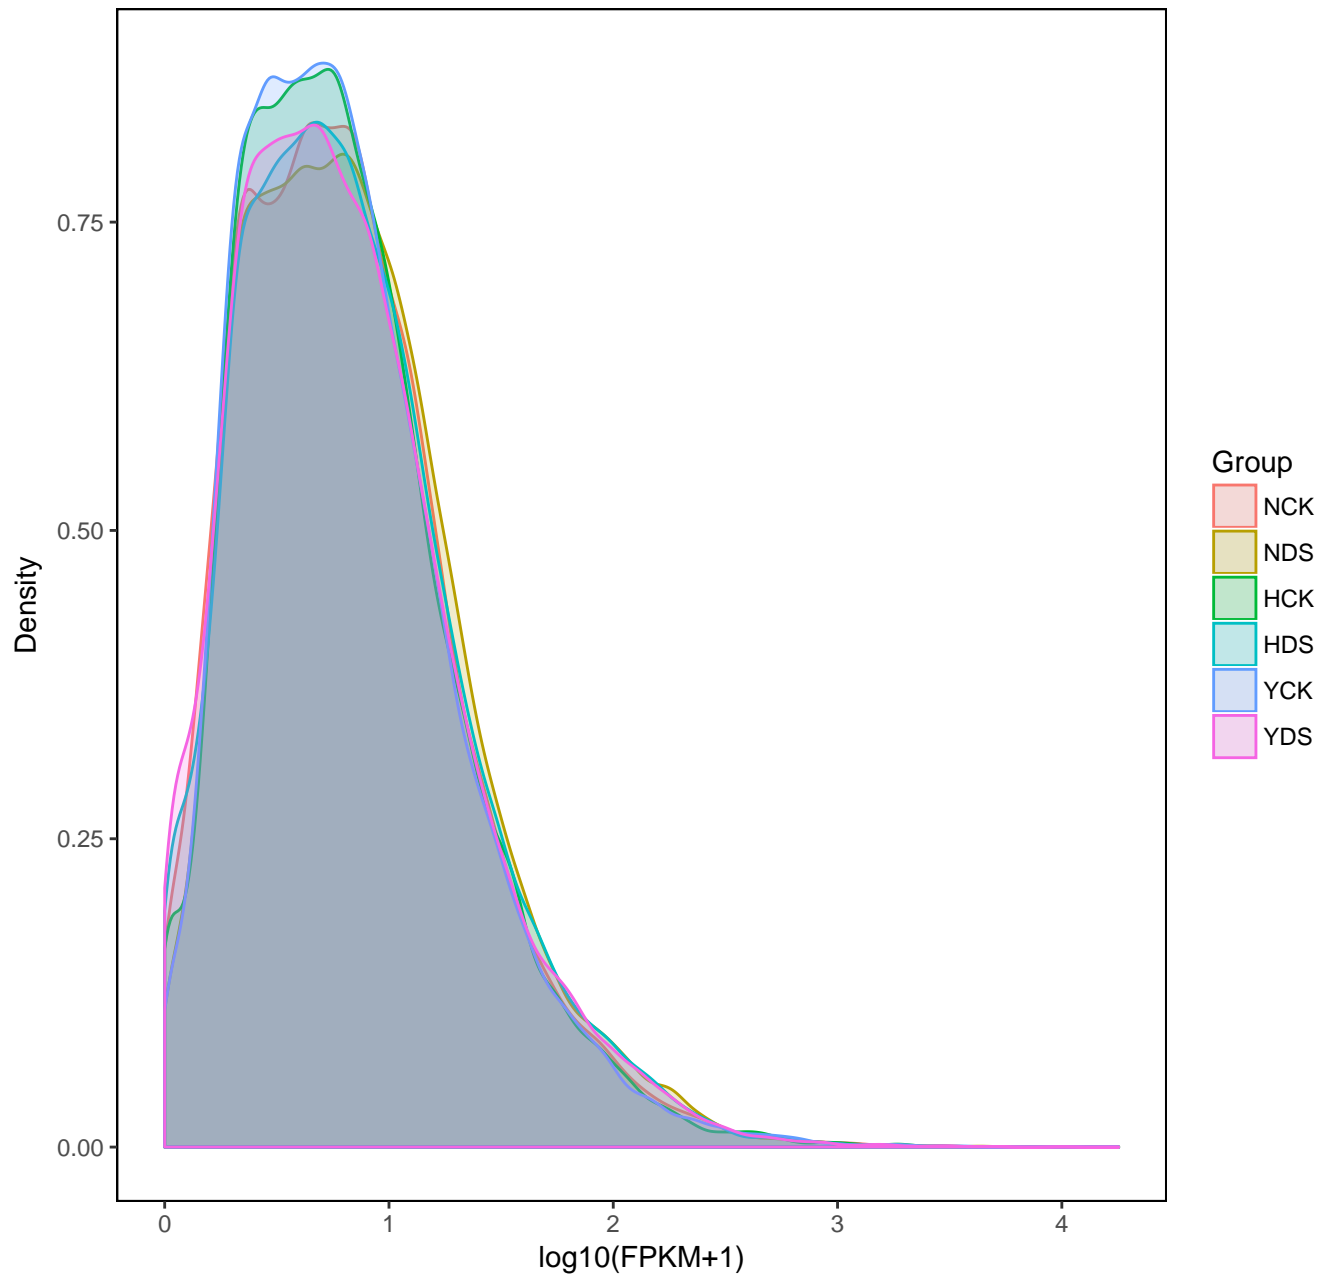

Supplement: s1 [file s1]
